# Supplementary material for: The neurology and neuropsychiatry of COVID-19: a systematic review and meta-analysis of the early literature reveals frequent CNS manifestations and key emerging narratives
Source: bioRxiv or medRxiv preprint supplement (doi:10.1101/2021.02.24.21252335), 2021-02-26
Supplement: Supplementary file [file media-9.pdf]

# Proportion of patients reporting myalgia in SARS-CoV-2 infection

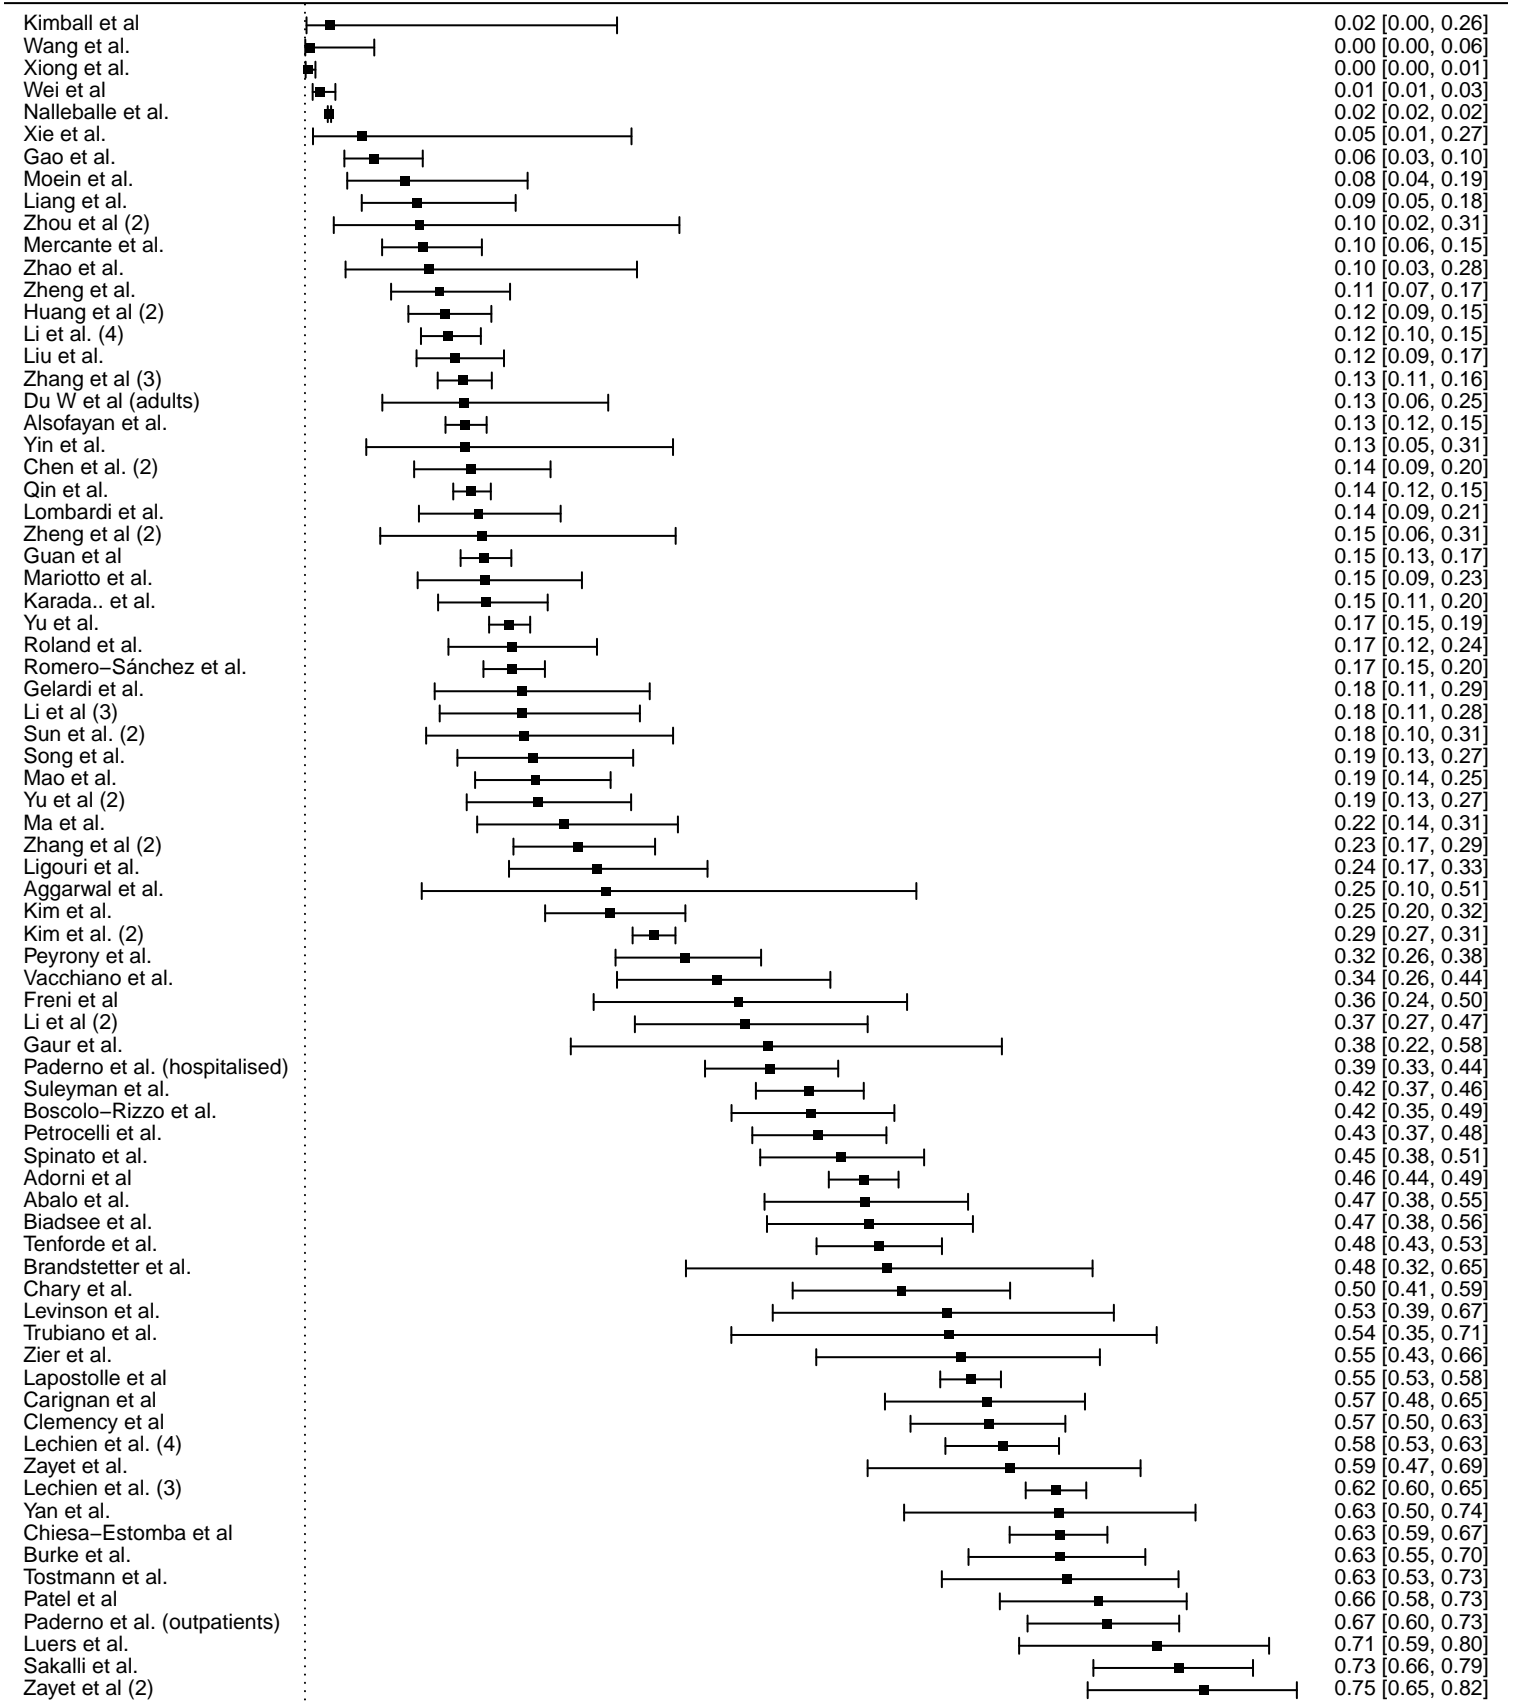

RE Model

0.25 [0.20, 0.31]

0 0.2 0.4 0.6 0.8 1

Proportion
