# Supplementary material for: The neurology and neuropsychiatry of COVID-19: a systematic review and meta-analysis of the early literature reveals frequent CNS manifestations and key emerging narratives
Source: bioRxiv or medRxiv preprint supplement (doi:10.1101/2021.02.24.21252335), 2021-02-26

# Proportion of patients reporting weakness in SARS-CoV-2 infection

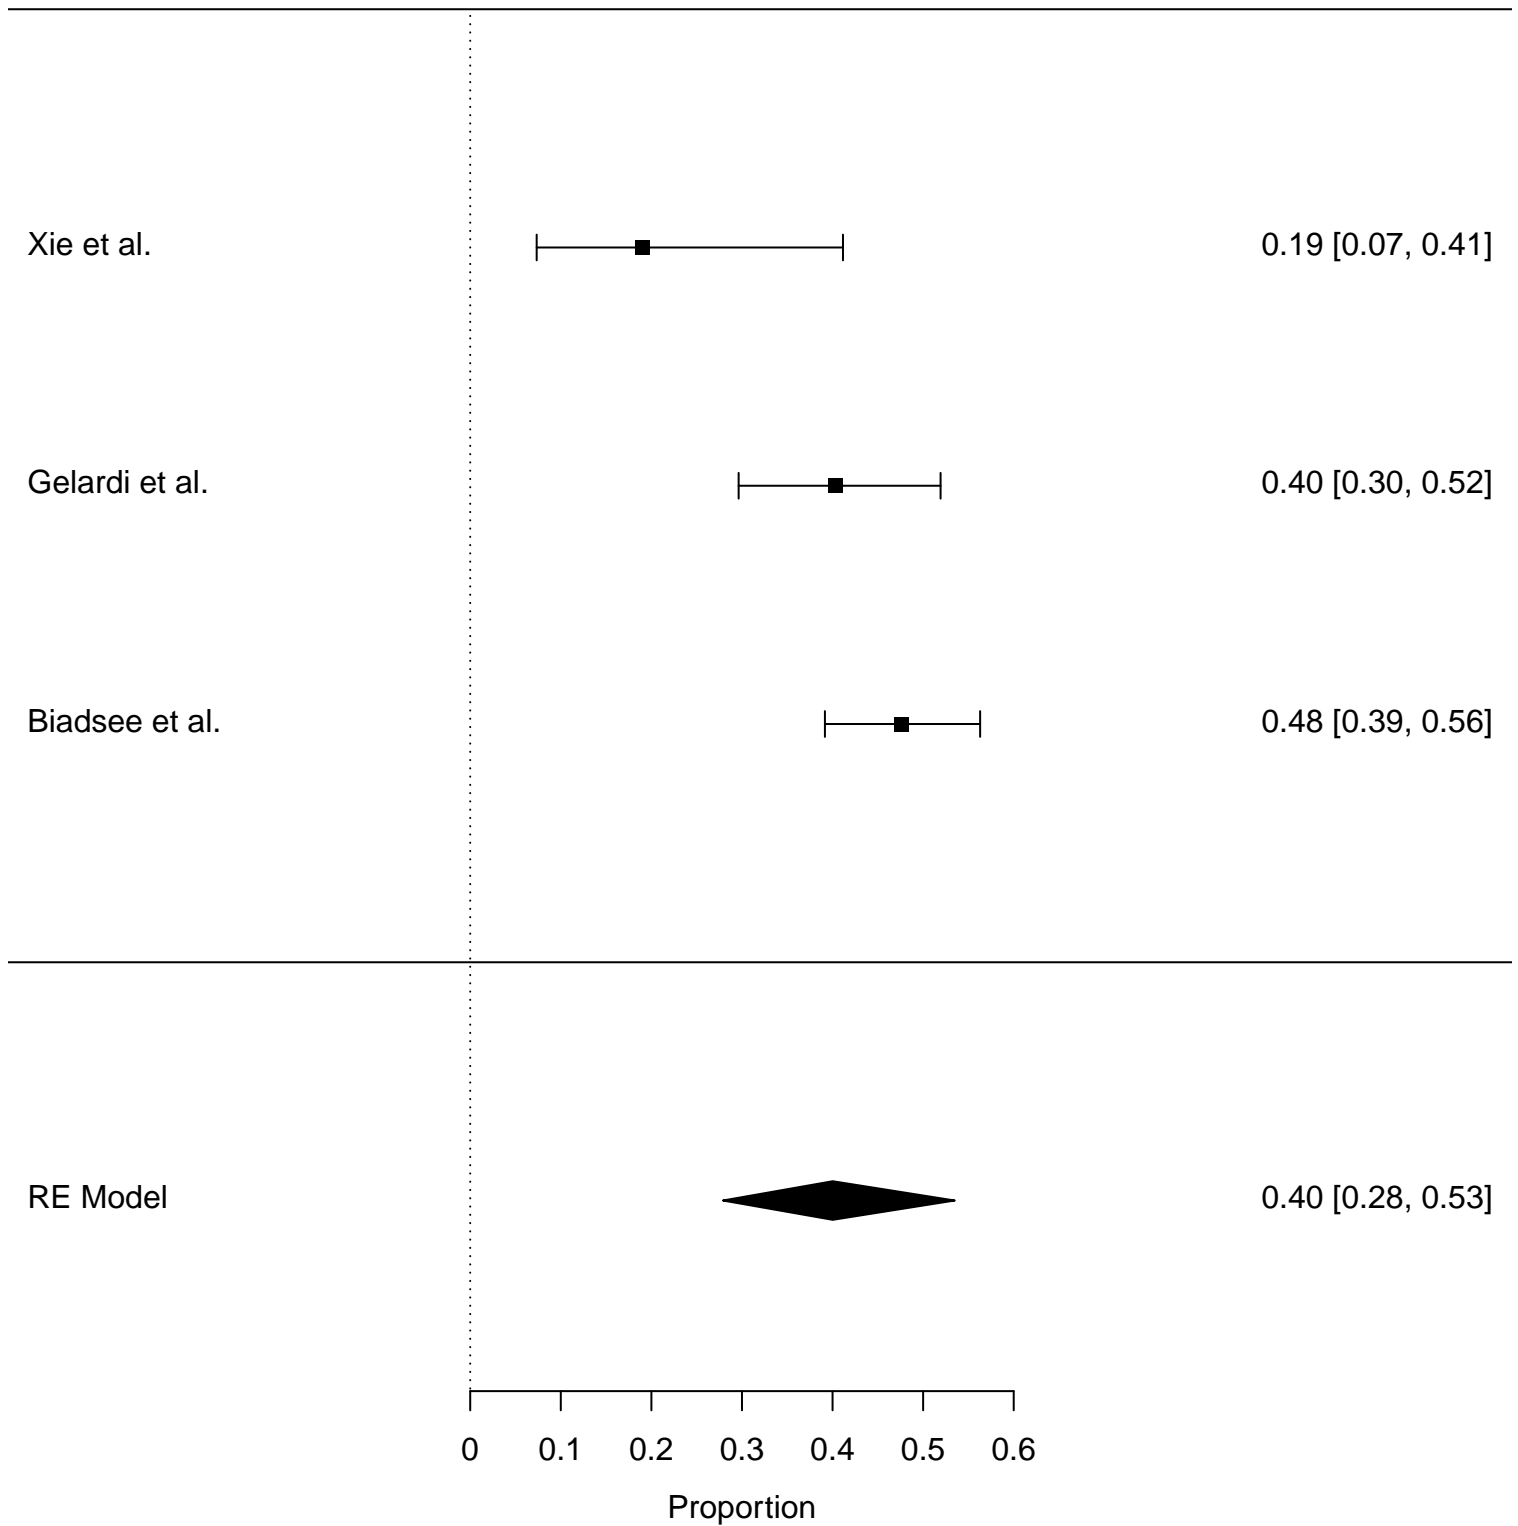

Supplement: Supplementary file [file media-27.pdf]
